# Supplementary material
Source: publisher figshare collection journal article supplement (https://frontiersin.figshare.com/ndownloader/files/22796792)

## Supplementary Figure S1 Sanger sequencing of circRNAs

ssc\_circ\_0000855

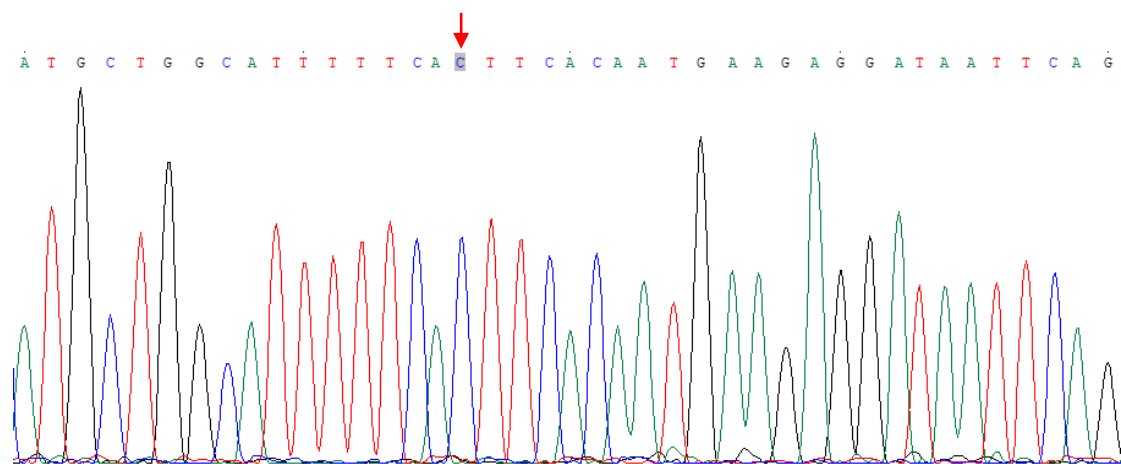

ssc\_circ\_0003379

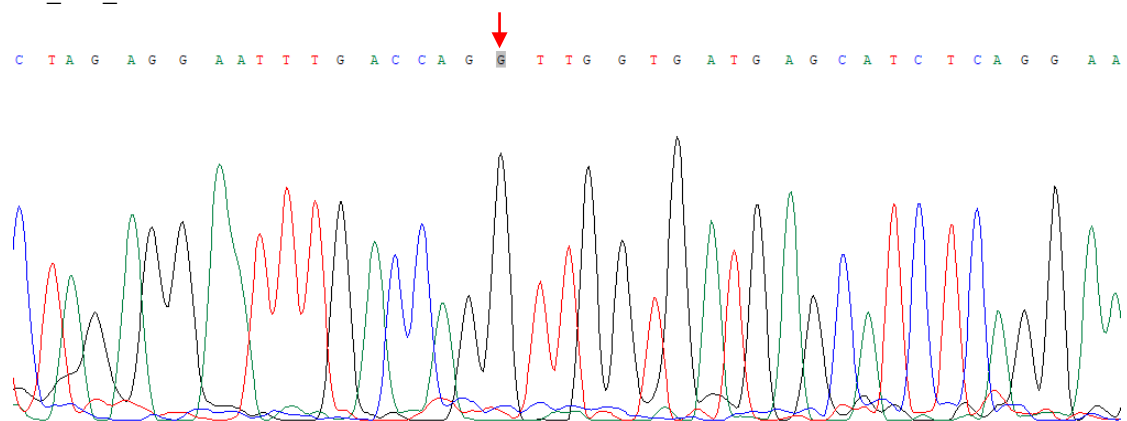

ssc\_circ\_0006700

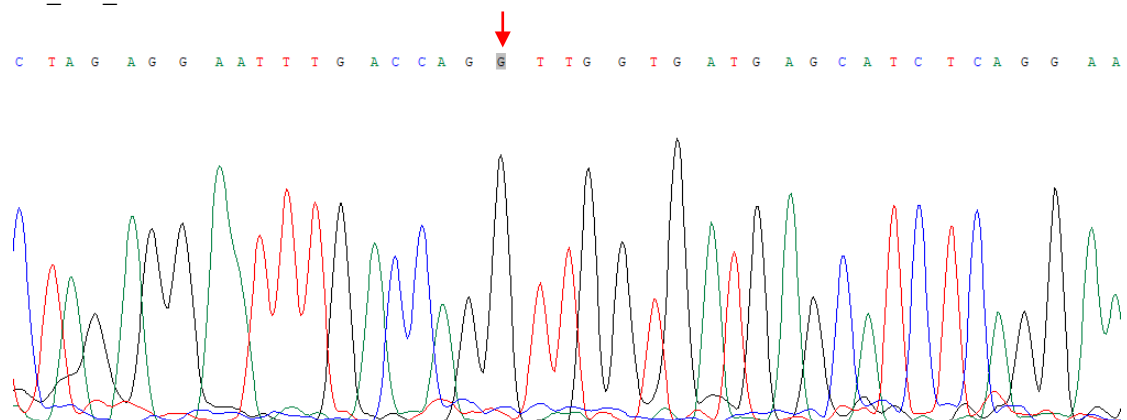

ssc\_circ\_0008730

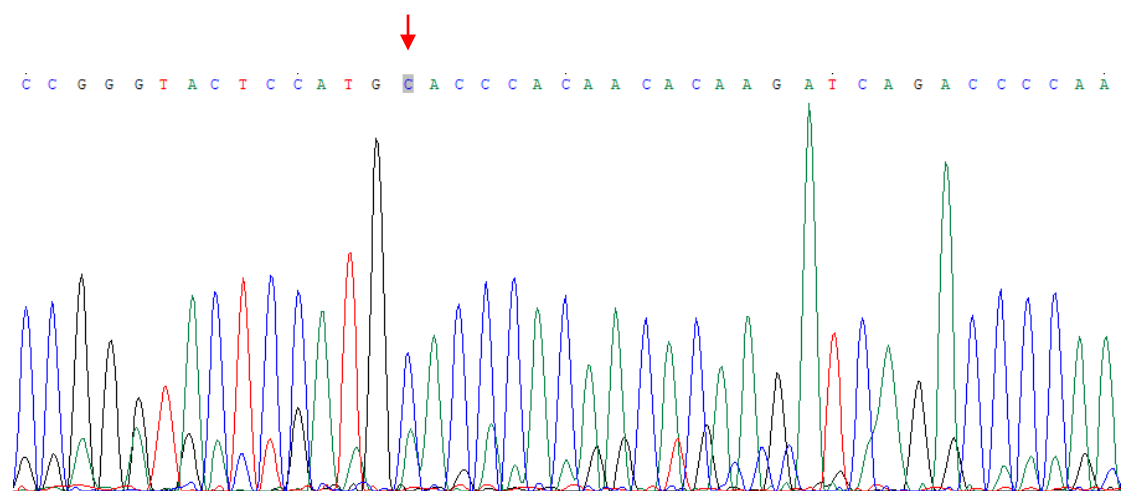

ssc\_circ\_0008748

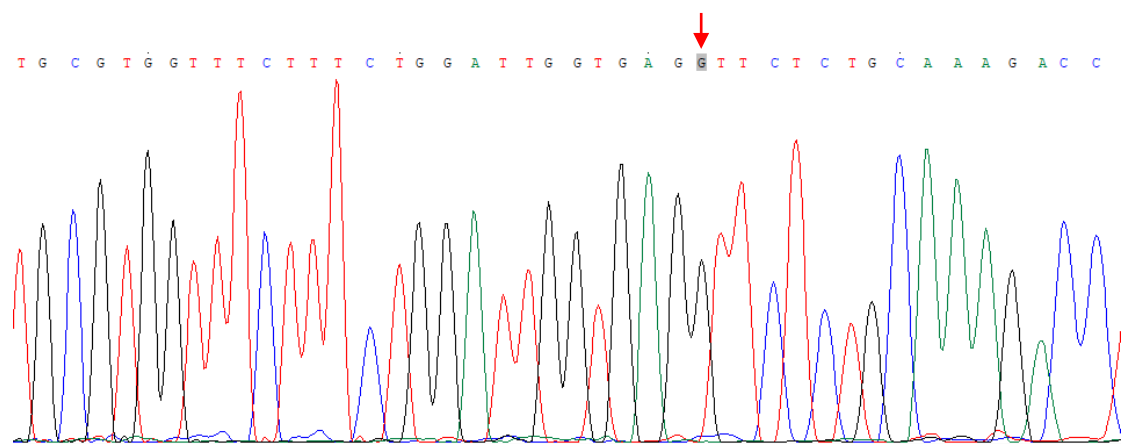

ssc\_circ\_0010058

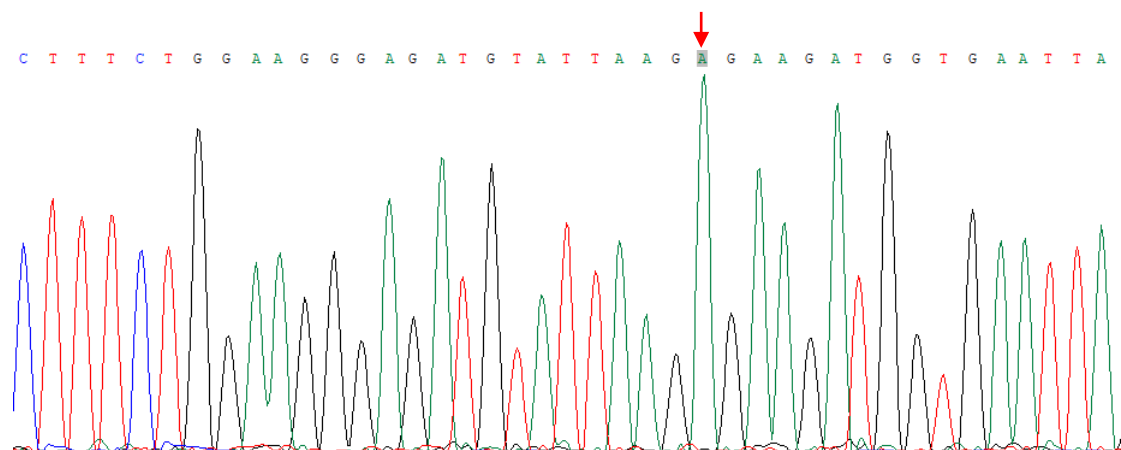

ssc\_circ\_0013036

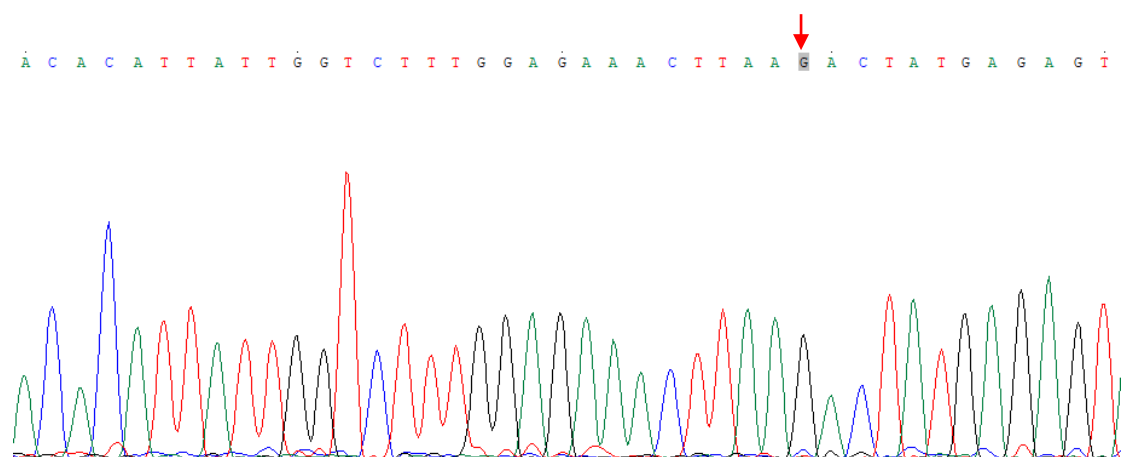

ssc\_circ\_0013564

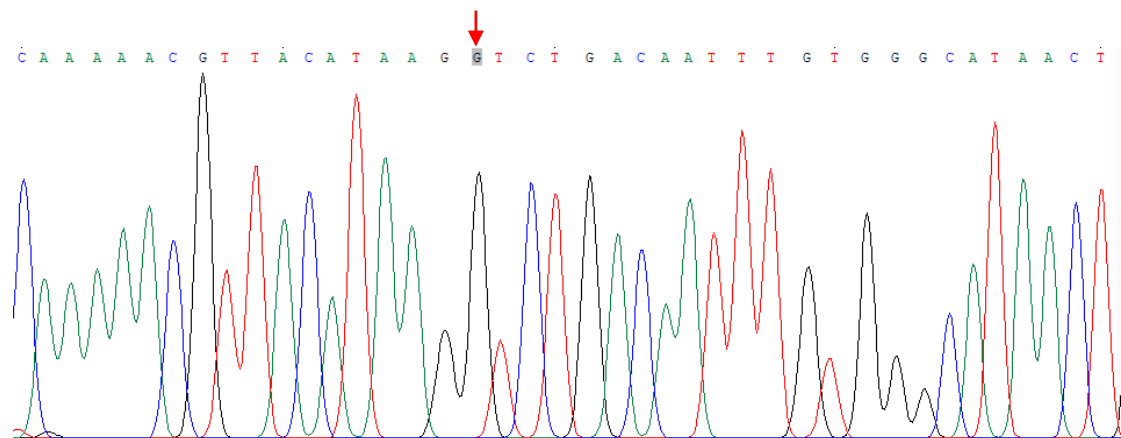

ssc\_circ\_0015312

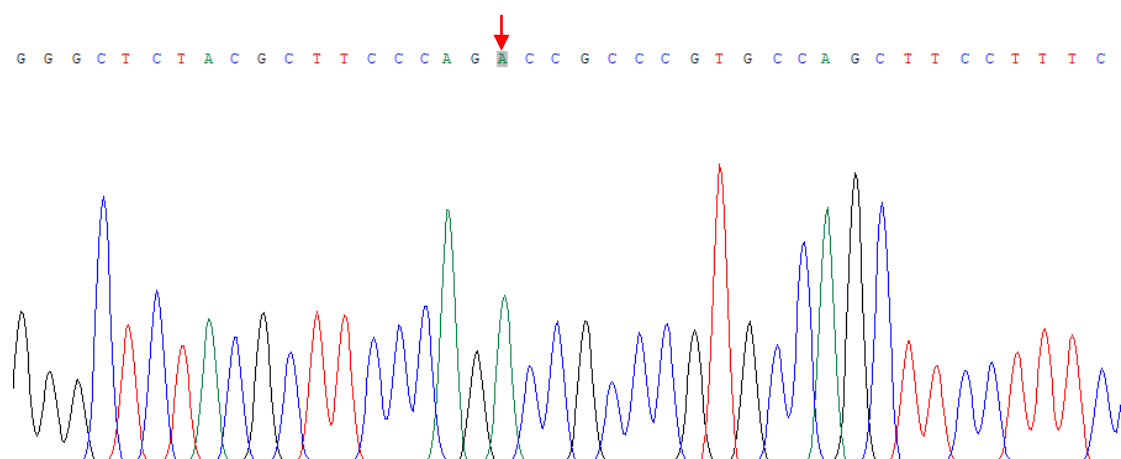

Supplement: Supplementary file 1 [file 22796792]
